# Supplementary material for: Ortho-functionalized pyridinyl-tetrazines break the inverse correlation between click reactivity and cleavage yields in click-to-release chemistry
Source: PubMed Central journal article supplement — Commun Chem. 2024 Dec 19;7:302. doi: 10.1038/s42004-024-01392-z (PMC11659415; doi:10.1038/s42004-024-01392-z), 2024-12-19
Supplement: 42004_2024_1392_MOESM3_ESM.pdf [file 42004_2024_1392_MOESM3_ESM.pdf]

# Description of Additional Supplementary Files

**File name:** Supplementary Data 1

**Description:** Cartesian coordinates of the DFT calculations
